# Supplementary material
Source: publisher site journal article supplement (https://www.dovepress.com/article/439127)
Supplement: Supplementary file 1 [file get_supplementary_file.php]

**Appendix 1**

**Table S1**. Comparative Analysis of Clinical Characteristics across Training and Verification Cohorts

| Variable | Training cohort (n=432) | Verification cohort (n=186) | T/χ2/Z value | *P* value |
| --- | --- | --- | --- | --- |
| Age, years | 50.51±8.78 | 51.16±8.73 | 0.844 | 0.399a |
| Male gender, n(%) | 245 (56.7%) | 97 (52.2%) | 1.095 | 0.295b |
| Hypertension, n(%) | 209 (48.4%) | 92 (49.5%) | 0.061 | 0.805b |
| Smoking, n(%) | 108 (25.0%) | 43 (23.1%) | 0.249 | 0.618b |
| BMI, kg/m2 | 29.23±4.85 | 29.45±4.94 | 0.522 | 0.602a |
| Waist circumference, cm | 97.06±14.61 | 96.61±14.79 | 0.352 | 0.725a |
| FBG, mmol/L | 5.3 (3.7, 7.3) | 5.3 (3.7, 7.5) | 0.321 | 0.749c |
| HbA1c, % | 7.05±1.94 | 7.21±1.84 | 0.935 | 0.350a |
| Triglycerides, mmol/L | 1.69 (1.23, 2.62) | 1.68 (1.18, 2.55) | 0.561 | 0.575c |
| TC, mmol/L | 3.98±1.33 | 3.97±1.29 | 0.126 | 0.900a |
| HDL-C, mmol/L | 1.05±0.41 | 1.08±0.40 | 1.077 | 0.282a |
| LDL-C, mmol/L | 2.50±0.81 | 2.50±0.86 | 0.106 | 0.916a |
| AST, IU/L | 19 (12, 35) | 19 (13, 34) | 0.053 | 0.958c |
| ALT, IU/L | 31 (14, 49) | 28 (15, 47) | 0.579 | 0.562c |
| ALB, IU/L | 39.60±6.78 | 40.46±6.46 | 1.470 | 0.142a |
| PLT, ×109/L | 246.41±49.34 | 245.24±48.90 | 0.271 | 0.786a |
| HOMA-IR | 1.87±0.62 | 1.88±0.62 | 0.297 | 0.766a |
| LSM, kPa | 5.5 (4.4, 6.2) | 5.6 (4.5, 5.9) | 0.511 | 0.609c |

afor independent sample t-test, bfor chi-square test, and cfor Mann-Whitney U test.

**
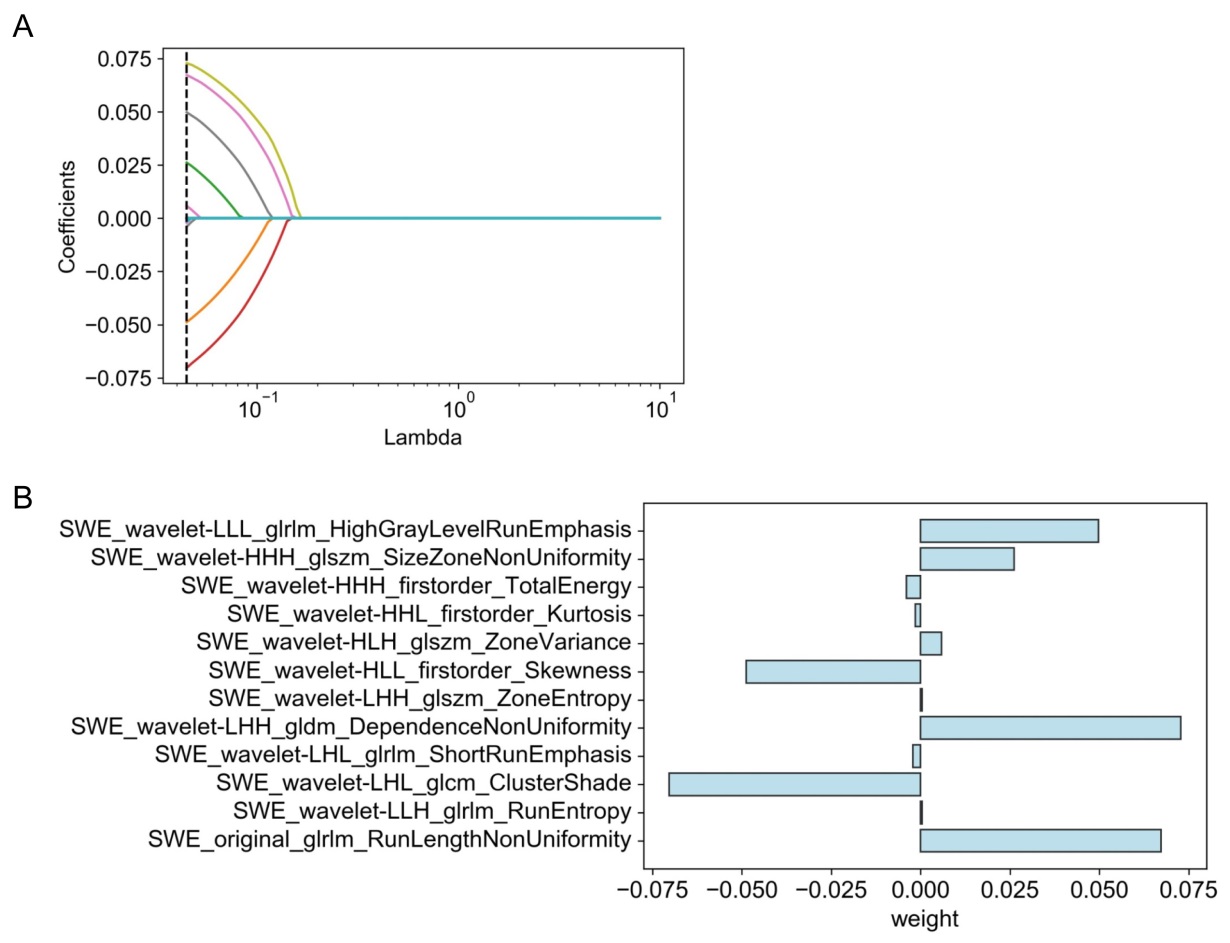
**

**Figure S1**. LASSO Regression-Guided Radiomics Feature Selection in SWE Segmentation. **Figure A** delineates the distribution of features filtered through LASSO, while **Figure** **B** presents the retained features alongside their respective weights. In the wavelet-transformed images, the low and high-frequency coefficient blocks are denoted as L and H, respectively.

**
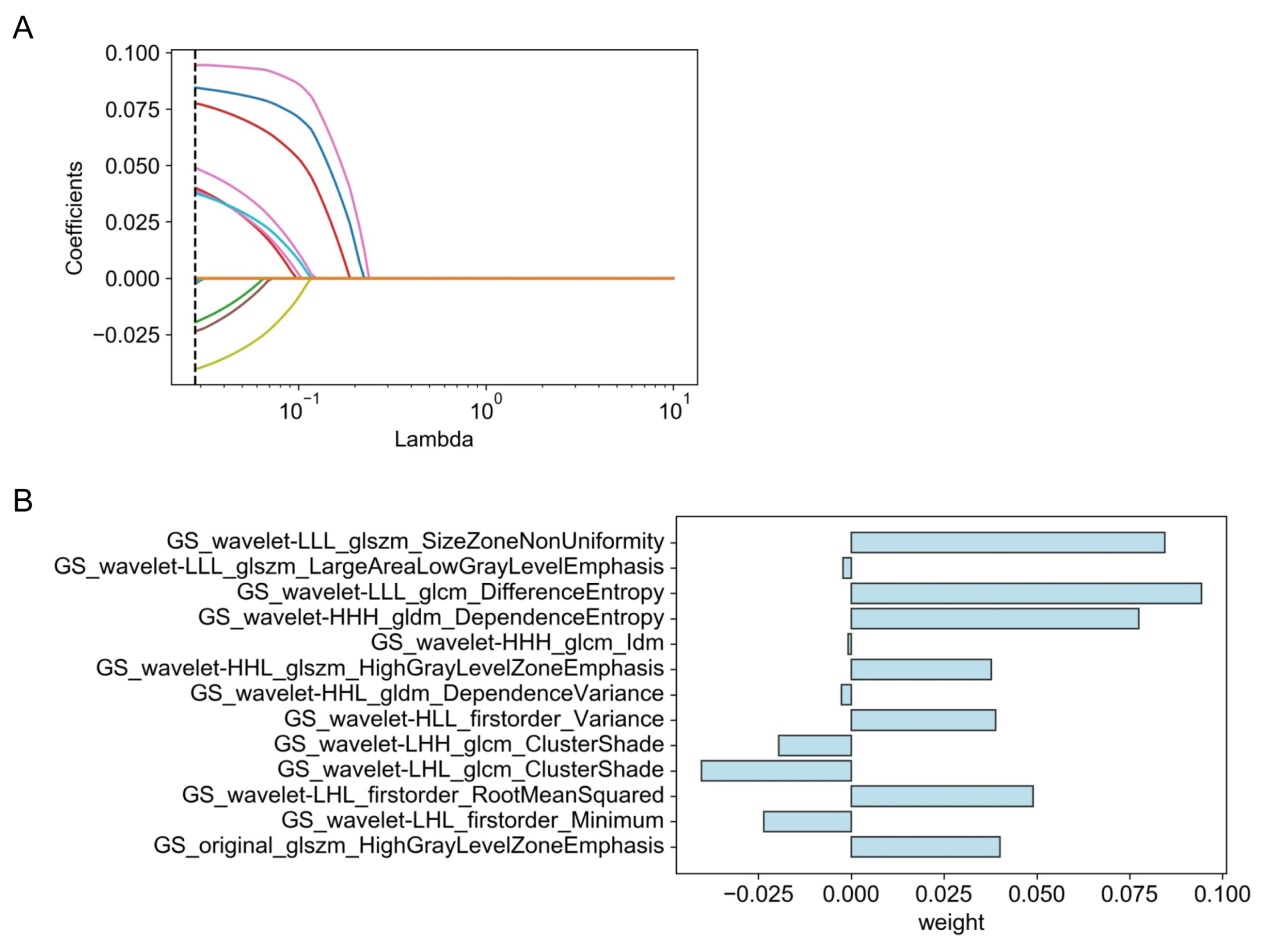
**

**Figure S2.** LASSO Regression-Driven Radiomics Feature Selection in Grayscale Segmentation. **Figure A** provides the distribution of LASSO-selected features, and **Figure B** illustrates the chosen features with their corresponding weights. GS: grayscale. In the wavelet-transformed images, the low and high-frequency coefficient blocks are denoted as L and H, respectively.

**Abbreviations in Appendix**

ALB: Albumin, ALT: Alanine Aminotransferase ratio, AST: Aspartate Aminotransferase, BMI: Body Mass Index, FBG: Fasting Blood Glucose, GS: Grayscale, HbA1c: Hemoglobin A1c, HDL-C: High Density Lipoprotein Cholesterol, HOMA-IR: Homeostasis Model Assessment of Insulin Resistance, LASSO: Least Absolute Shrinkage and Selection Operator, LDL-C: Low Density Lipoprotein Cholesterol, PLT: Platelet Counts, SWE: Shear Wave Elastography, TC: Total Cholesterol.
